# Supplementary material
Source: PubMed Central journal article supplement (PMC3446631)
Supplement: JVI.01374-12_zjv999096550so1.pdf [file JVI.01374-12_zjv999096550so1.pdf]

Table S1. List of sequences used.

| avian    | nPPR | PPR | mu | G3       | nPPR | PPR | mu | G4       | nPPR | PPR | mu |
|----------|------|-----|----|----------|------|-----|----|----------|------|-----|----|
| AM943646 | X    | X   |    | AF060668 | X    | X   | X  | AB193177 | X    | X   | X  |
| AM943647 | X    | X   |    | AF060669 | X    | X   | X  | AB193178 | X    | X   | X  |
| AY535004 | X    | X   |    | AF082843 | X    | X   | X  | AB197673 | X    | X   | X  |
| EF206691 | X    | X   |    | AF455784 |      | X   |    | AB197674 | X    | X   | X  |
| GU954430 | X    | X   |    | AP003430 | X    | X   |    | AB200239 | X    | X   | X  |
| G1       |      |     |    | AY115488 | X    | X   |    | AB220971 | X    | X   | X  |
| AF051830 | X    | X   | X  | AY575857 | X    | X   | X  | AB220972 | X    | X   | X  |
| AF076239 | X    | X   | X  | AY575858 | X    | X   |    | AB220973 | X    | X   | X  |
| AF185822 | X    | X   | X  | AY575859 | X    | X   |    | AB220974 | X    | X   | X  |
| AF459438 | X    | X   | X  | EU360977 | X    | X   |    | AB220975 | X    | X   | X  |
| AY204877 | X    | X   | X  | EU375463 | X    | X   | X  | AB220976 | X    | X   | X  |
| AY230202 | X    | X   | X  | EU495148 | X    | X   |    | AB220977 | X    | X   | X  |
| D10330   | X    | X   | X  | EU495149 |      | X   |    | AB220978 | X    | X   | X  |
| D11092   | X    | X   | X  | EU495151 |      | X   |    | AB220979 | X    | X   | X  |
| D11093   | X    | X   | X  | EU495153 |      | X   |    | AB253420 |      | X   |    |
| DQ459342 | X    | X   | X  | EU495154 |      | X   |    | AB291959 | X    | X   | X  |
| FJ457024 | X    | X   | X  | EU495155 |      | X   |    | AB291964 | X    | X   | X  |
| M73218   | X    | X   | X  | EU495156 |      | X   |    | AB291965 | X    | X   | X  |
| M80581   | X    | X   | X  | EU495157 |      | X   |    | AB291966 | X    | X   | X  |
| M94177   | X    | X   | X  | EU495158 |      | X   |    | AB291967 | X    | X   | X  |
| X98292   | X    | X   | X  | EU495159 |      | X   |    | AB291968 | X    | X   | X  |
| X99441   | X    | X   | X  | EU495160 |      | X   |    | AB369688 | X    | X   | X  |
| G3       |      |     |    | EU495161 |      | X   |    | AB369690 | X    | X   | X  |
| AB073912 | X    | X   | X  | EU495162 |      | X   |    | AB480825 |      | X   |    |
| AB074918 | X    | X   | X  | EU495163 |      | X   |    | AB481227 | X    | X   |    |
| AB074920 | X    | X   | X  | EU495164 |      | X   |    | AB521805 | X    | X   | X  |
| AB089824 | X    | X   | X  | EU495165 |      | X   |    | AB521806 | X    | X   | X  |
| AB091394 | X    | X   | X  | EU495166 |      | X   |    | AB602439 |      | X   |    |
| AB189070 |      | X   | X  | EU495167 |      | X   |    | AB602440 |      | X   |    |
| AB189071 |      | X   | X  | EU495168 |      | X   |    | AJ272108 | X    | X   |    |
| AB189072 | X    | X   | X  | EU495169 |      | X   |    | AY594199 | X    | X   |    |
| AB189073 | X    | X   | X  | EU495170 |      | X   |    | AY723745 | X    | X   | X  |
| AB189074 | X    | X   | X  | EU495171 |      | X   |    | DQ279091 | X    | X   |    |
| AB189075 | X    | X   | X  | EU495172 |      | X   |    | DQ450072 | X    | X   |    |
| AB222182 |      | X   | X  | EU495173 |      | X   |    | EF077630 | X    | X   |    |
| AB222183 |      | X   | X  | EU495174 |      | X   |    | EF570133 | X    | X   |    |
| AB222184 |      | X   | X  | EU495175 |      | X   |    | EU366959 | X    | X   |    |
| AB236320 |      | X   | X  | EU495176 |      | X   |    | EU676172 | X    | X   |    |
| AB246676 | X    | X   |    | EU495177 |      | X   |    | FJ610232 | X    | X   | X  |
| AB248520 | X    | X   | X  | EU495179 |      | X   |    | FJ763142 | X    | X   |    |
| AB248521 | X    | X   |    | EU495180 |      | X   |    | GU119960 | X    | X   | X  |
| AB248522 | X    | X   |    | EU495181 |      | X   |    | GU119961 | X    | X   | X  |
| AB290312 | X    | X   | X  | EU495182 |      | X   |    | GU188851 | X    | X   | X  |
| AB290313 | X    | X   | X  | EU495183 |      | X   |    | GU206559 | X    | X   | X  |
| AB291951 | X    | X   | X  | EU495184 |      | X   |    | GU361892 | X    | X   | X  |
| AB291952 | X    | X   | X  | EU495185 |      | X   |    | HM152568 | X    | X   | X  |
| AB291953 | X    | X   | X  | EU495186 |      | X   |    | HM439284 | X    | X   | X  |
| AB291954 | X    | X   | X  | EU495187 |      | X   |    | HQ634346 | X    | X   |    |
| AB291955 | X    | X   | X  | EU495188 |      | X   |    | JF915746 |      | X   |    |

|          |   |   |   |          |   |   |   |           |   |   |   |
|----------|---|---|---|----------|---|---|---|-----------|---|---|---|
| AB291956 | X | X | X | EU495189 |   | X |   | rubivirus |   |   |   |
| AB291957 | X | X | X | EU495190 |   | X |   | AB047330  | X | X | X |
| AB291958 | X | X | X | EU723512 | X | X | X | AB222609  | X | X | X |
| AB291960 | X | X | X | EU723513 | X | X | X | AF435865  | X | X | X |
| AB291961 | X | X | X | EU723514 | X | X | X | AF435866  | X | X | X |
| AB291962 | X | X | X | EU723515 | X | X | X | AY258322  | X | X | X |
| AB291963 | X | X | X | EU723516 | X | X | X | DQ085338  | X | X | X |
| AB301710 | X | X | X | FJ426403 | X | X | X | DQ085339  | X | X | X |
| AB362839 |   | X |   | FJ426404 | X | X | X | DQ085340  | X | X | X |
| AB362840 |   | X |   | FJ527832 | X | X | X | DQ085341  | X | X | X |
| AB362841 |   | X |   | FJ653660 | X | X | X | DQ085342  | X | X | X |
| AB362842 |   | X |   | FJ705359 |   | X | X | DQ085343  | X | X | X |
| AB362843 |   | X |   | FJ956757 | X | X | X | DQ388279  | X | X | X |
| AB369687 |   | X | X | FJ998008 |   | X | X | DQ388280  | X | X | X |
| AB369689 | X | X | X | HM055578 | X | X | X | DQ388281  | X | X | X |
| AB369691 | X | X | X | HQ389543 | X | X | X | JF727653  | X | X | X |
| AB425830 |   | X |   | JN906974 | X | X | X | JF727654  | X | X | X |
| AB425831 |   | X |   | JN906975 | X | X | X | JN635281  | X | X | X |
| AB437316 | X | X | X | JN906976 | X | X | X | JN635282  | X | X | X |
| AB437317 | X | X | X | JQ036300 |   | X |   | JN635283  | X | X | X |
| AB437318 | X | X | X | G4       |   |   |   | JN635284  | X | X | X |
| AB437319 | X | X |   | AB074915 | X | X | X | JN635285  | X | X | X |
| AB443623 | X | X | X | AB074917 | X | X | X | JN635286  | X | X | X |
| AB443624 | X | X | X | AB080575 | X | X | X | JN635287  | X | X | X |
| AB443625 | X | X | X | AB091395 | X | X | X | JN635288  | X | X | X |
| AB443626 | X | X | X | AB097811 | X | X | X | JN635289  | X | X | X |
| AB443627 | X | X | X | AB097812 | X | X | X | JN635291  | X | X | X |
| AB481226 | X | X |   | AB099347 | X | X | X | JN635292  | X | X | X |
| AB481228 | X | X |   | AB108537 | X | X | X | JN635293  | X | X | X |
| AB481229 | X | X |   | AB161717 | X | X | X | JN635294  | X | X | X |
| AB630970 | X | X | X | AB161718 | X | X | X | JN635295  | X | X | X |
| AB630971 | X | X | X | AB161719 | X | X | X | JN635296  | X | X | X |
| AB698071 | X | X | X | AB193176 | X | X | X | NC_001545 | X | X | X |
|          |   |   |   |          |   |   |   | X72393    | X | X | X |

Sequences are clustered as avian HEV, HEV genotypes 1, 3 and 4, and rubivirus. nPPR, ORF1 sequences without the polyproline region; PPR, the polyproline sequence and mu, sequences for which the mean substitution rate was estimated through Bayesian inference.
